# Supplementary material for: BrewerIX enables allelic expression analysis of imprinted and X-linked genes from bulk and single-cell transcriptomes
Source: Springer Nature journal article supplement (doi:10.1038/s42003-022-03087-4), 2022-02-17
Supplement: MOESM1 [file 42003_2022_3087_MOESM1_ESM.pdf]

## Supplementary information

### **BrewerIX enables allelic expression analysis of Imprinted and X-linked genes from bulk and single-cell transcriptomes**

Paolo Martini<sup>1,2§</sup>, Gabriele Sales<sup>1§</sup>, Linda Diamante<sup>3</sup>, Valentina Perrera<sup>3,4</sup>, Chiara Colantuono<sup>5</sup>, Sara Riccardo<sup>5</sup>, Davide Cacchiarelli<sup>5,6</sup>, Chiara Romualdi<sup>1\*</sup> and Graziano Martello<sup>1\*</sup>

Affiliations:

<sup>1</sup> Department of Biology, University of Padova, Padua, Italy.

<sup>2</sup> Department of Molecular and Translational Medicine, University of Brescia, Brescia, Italy.

<sup>3</sup> Department of Molecular Medicine, Medical School, University of Padova, Padua, Italy.

<sup>4</sup> International School for Advanced Studies (SISSA/ISAS), Trieste, 34136, Italy.

<sup>5</sup> Telethon Institute of Genetics and Medicine (TIGEM), Armenise/Harvard Laboratory of Integrative Genomics, Pozzuoli, Italy

<sup>6</sup> Department of Translational Medicine, University of Naples “Federico II”, Naples, Italy

\* e-mail: chiara.romualdi@unipd.it; graziano.martello@unipd.it

§ these authors contributed equally to the work

Supplementary Figure 1

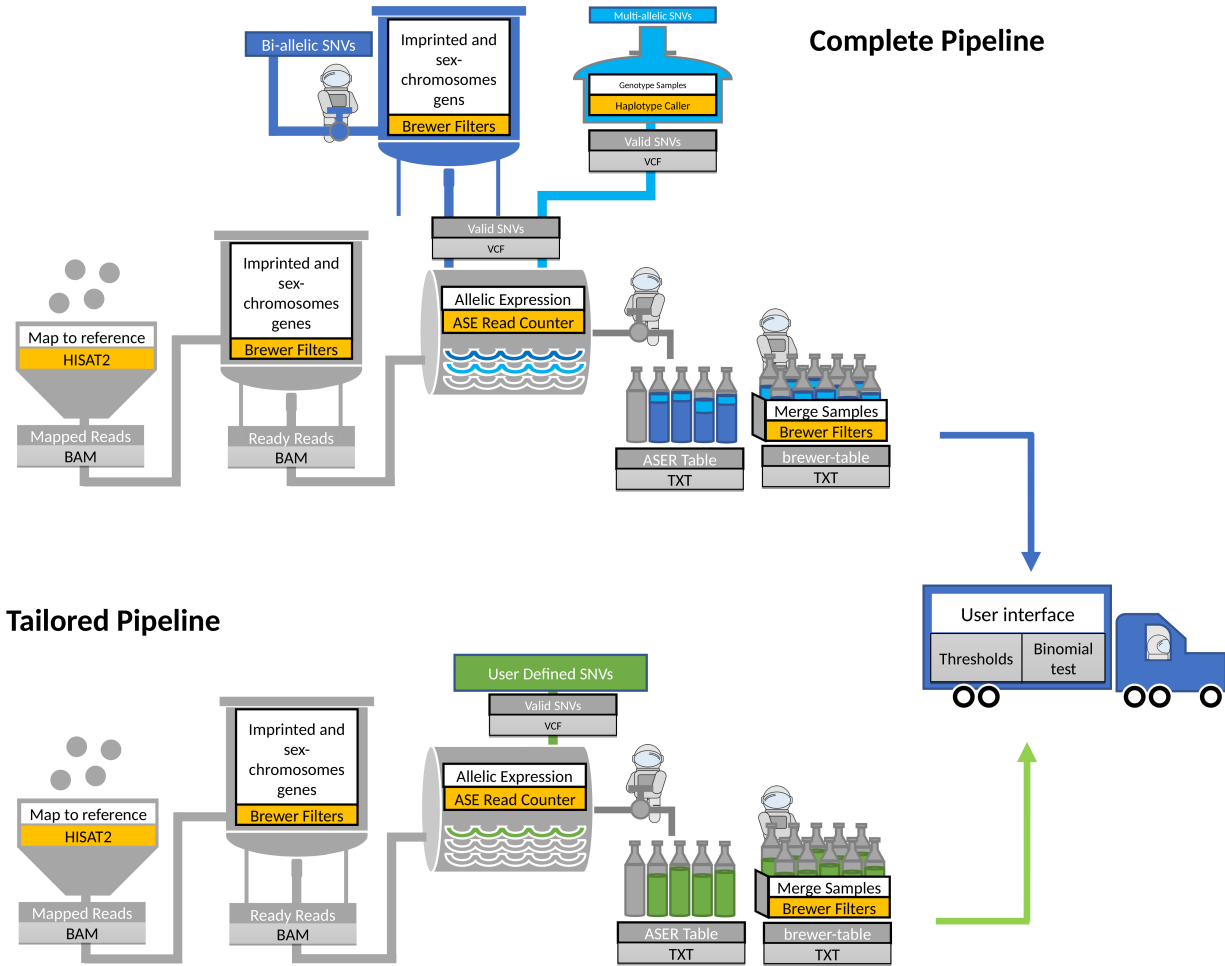

**Supplementary Figure 1.** Complete and Tailored pipelines overview. The Complete pipeline sacrifices speed for the sake of completeness by using a larger set of SNVs obtained merging i) the SNVs called by HaplotypeCaller (<https://gatk.broadinstitute.org>) on the user dataset using a pre-compiled set of multi-allelic SNVs and ii) the bi-allelic set used in the Standard pipeline. The use of a larger set of SNVs will increase the power to detect bi-allelic expression. The Tailored Pipeline is meant for users that need to evaluate their own set of SNVs for example those computed using DNA-seq data of matched samples. This allows the user to evaluate imprinting and X-inactivation starting directly from the actual SNV profile of the samples. While the input files for the Standard and the Complete pipelines are only fastq files derived from RNA-seq experiments, the Tailored pipeline additionally requires the VCF file with a set of bi-allelic SNVs. Both Complete and Tailored pipeline results can be further analysed and visualized through the User Interface.

Supplementary Figure 2

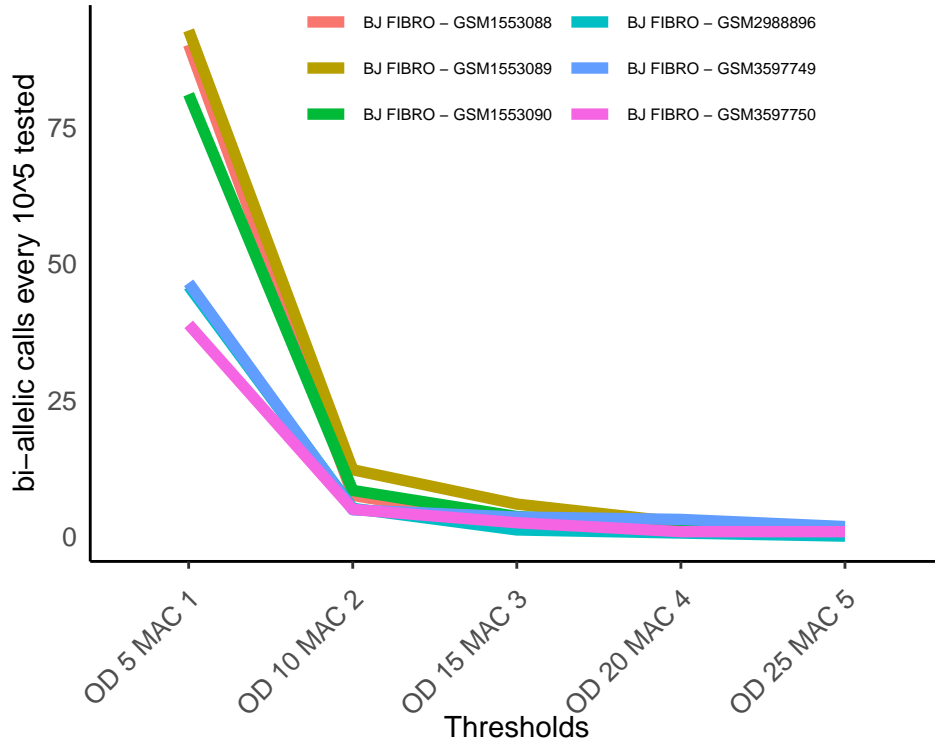

**Supplementary Figure 2.** False positives bi-allelic calls estimated by analysis of transcripts on the X chromosome in 6 male BJ fibroblasts samples. On the x axis thresholds combination of overall depth (OD) and minor allele coverage (MAC).

### Supplementary Figure 3

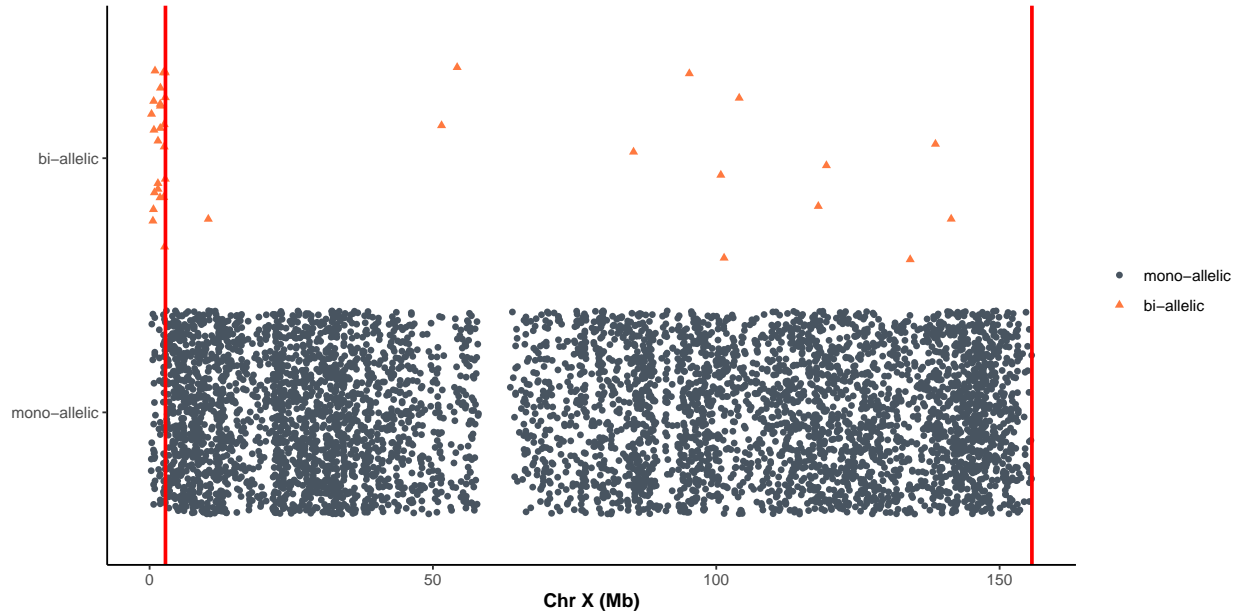

**Supplementary Figure 3.** BJ fibroblasts genomic DNA analyzed by SNP Array (Affymetrix Mapping 250K Nsp SNP Array, GEO: GSM1868966, series GSE72531). Grey dots are the mono-allelic SNVs. Orange triangles are the bi-allelic SNVs. The vertical red lines indicate the boundaries of PseudoAutosomal Regions (PARs) at both tips of the X chromosome. Excluding the PARs, we observed 13 bi-allelic SNVs out of 5444 analysed (2 every 1,000).

Supplementary Figure 4

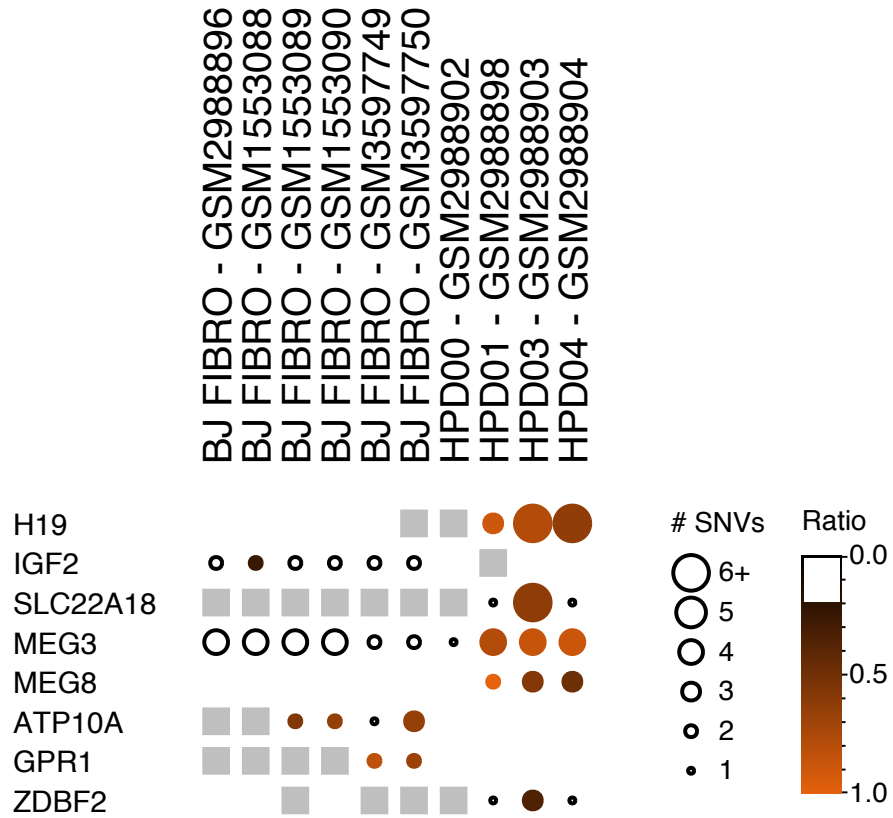

**Supplementary Figure 4.** BrewerIX gene summary panel. Results on isogenic BJ fibroblasts and both primed and naive iPSCs obtained by BrewerIX using the Standard pipeline. The larger the dot, the higher the number of SNVs supporting the bi-allelic estimate, the darker the orange, the closer to 0.5 is the average of the ratios of all the bi-allelic SNVs. Empty spots are genes with no evidence of bi-allelic expression, white spots are genes with no read overlapping any SNVs

Supplementary Figure 5

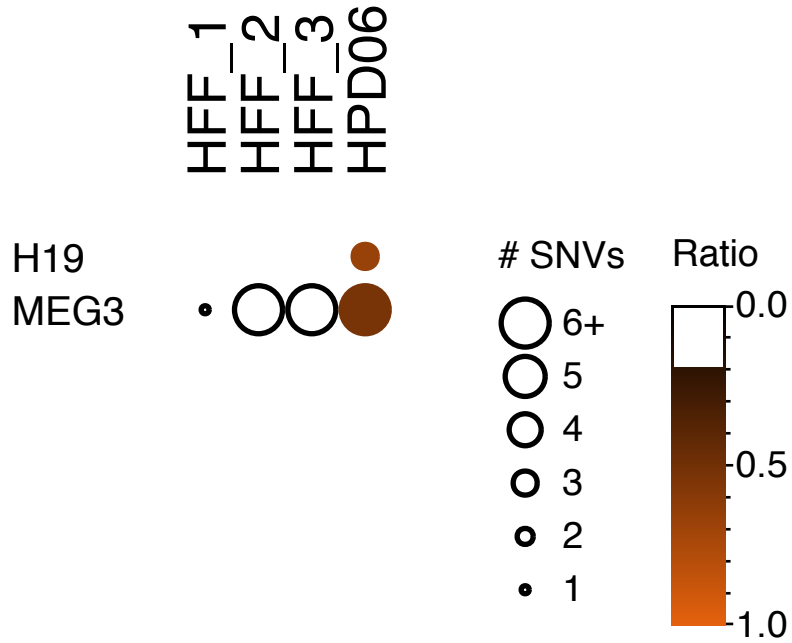

**Supplementary Figure 5.** BrewerIX gene summary panel. Results on HFF iPS reprogramming dataset (GSE110377) and 3 normal HFF (GSE93226) obtained by BrewerIX in Standard mode. The larger the dot, the higher the number of SNVs supporting the bi-allelic estimate, the darker the orange, the closer to 0.5 is the average of the ratios of all the bi-allelic SNVs. Empty spots are genes with no evidence of bi-allelic expression, white spots are genes with no read overlapping any SNVs.

### Supplementary Figure 6

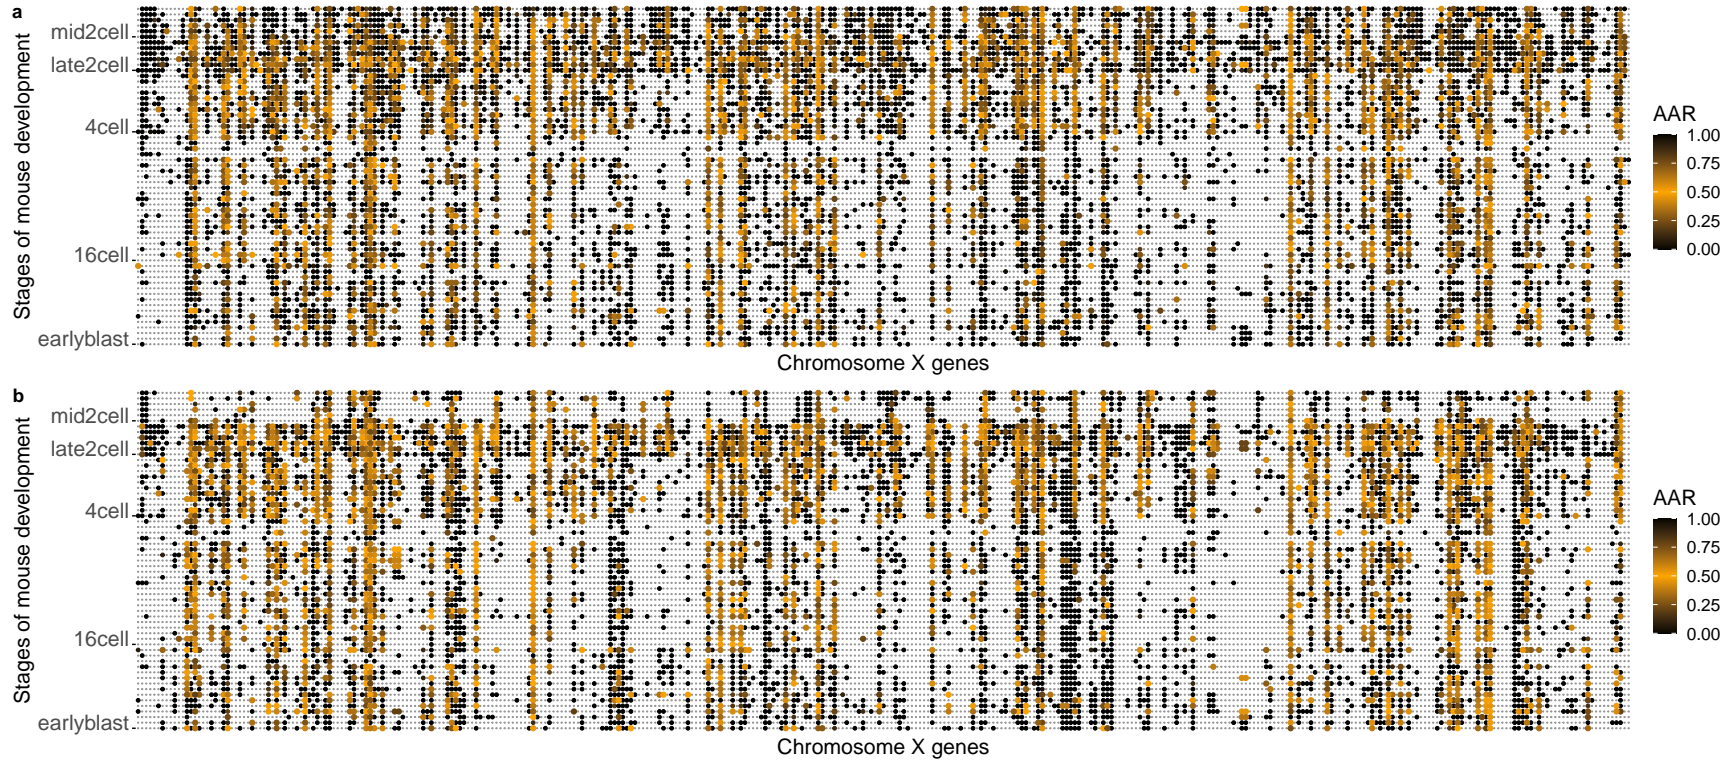

**Supplementary Figure 6.** X-chromosomes activation status of female samples from dataset GSE45719. Single cells from early mouse embryos at the indicated stage were analysed by single-cell RNA sequencing. a, Average Allelic Ratio of X-chromosome genes (AAR, maternal / total) from the custom analysis performed by Deng and colleagues. b, Average Allelic Ratio of X-chromosome genes (AAR, minor / tot) using BrewerIX computed values. Black dots indicate mono-allelic expression; orange dots indicate bi-allelic expression (AAR=0.5). Grey dots indicate transcripts that were not detected.

Supplementary Figure 7

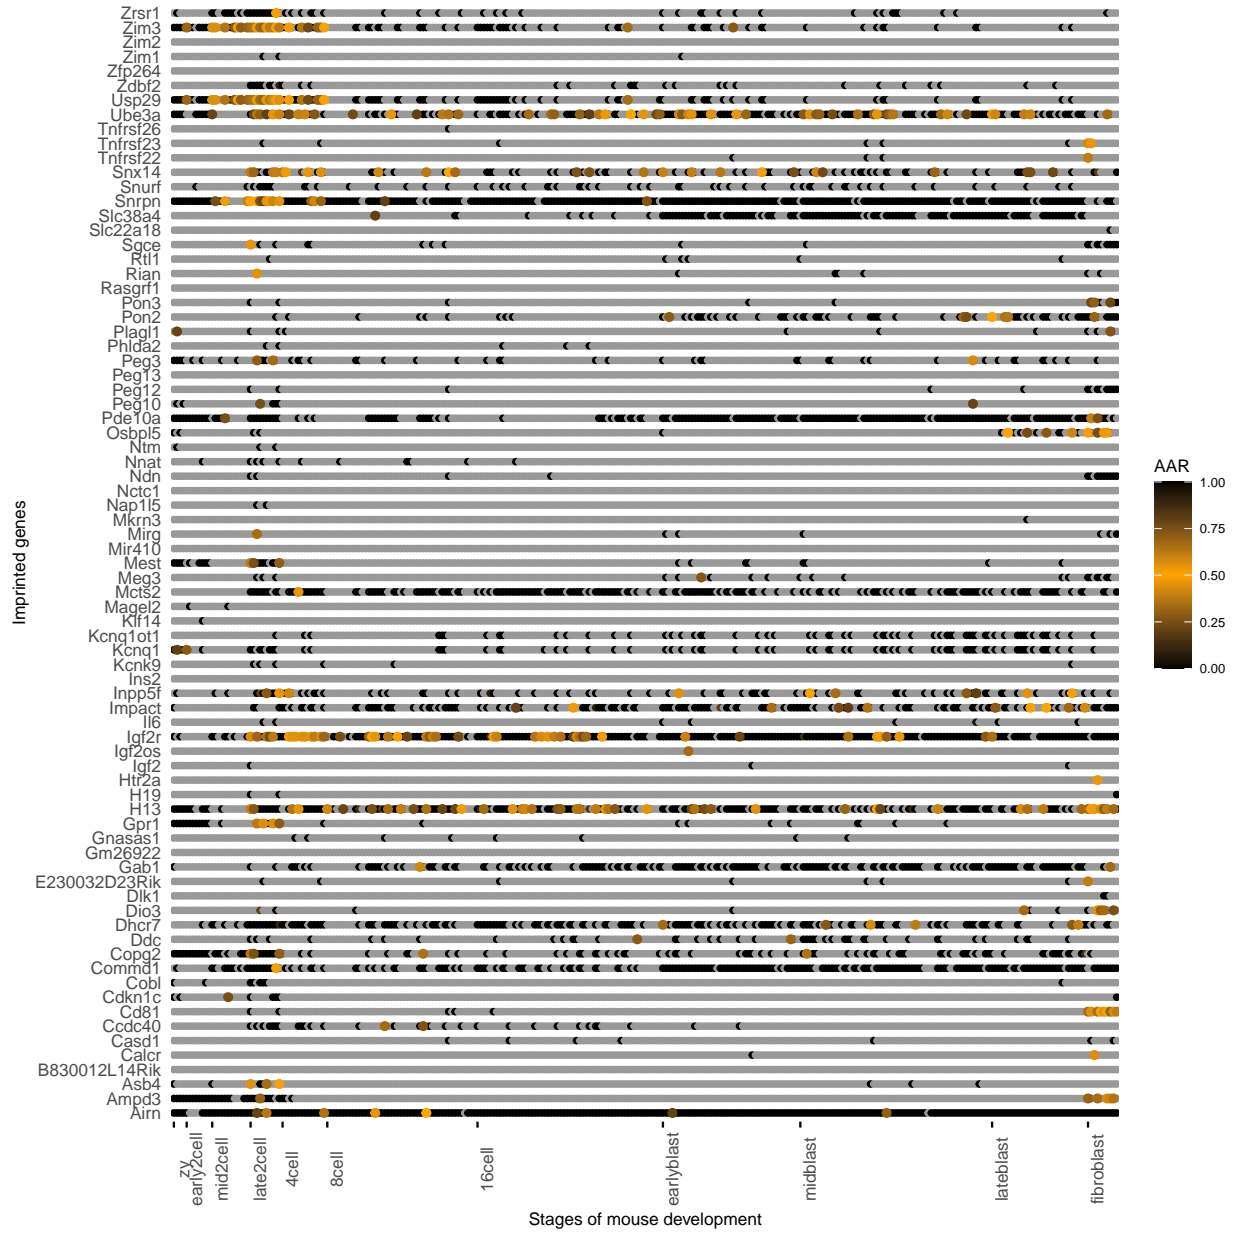

**Supplementary Figure 7.** Average allelic ratio of imprinted genes across developmental stages computed by BrewerIX on dataset GSE45719. Black dots indicate mono-allelic expression; orange dots indicate bi-allelic expression (AAR=0.5). Grey dots indicate transcripts that were not detected. See also Figure 2c.

Supplementary Figure 8

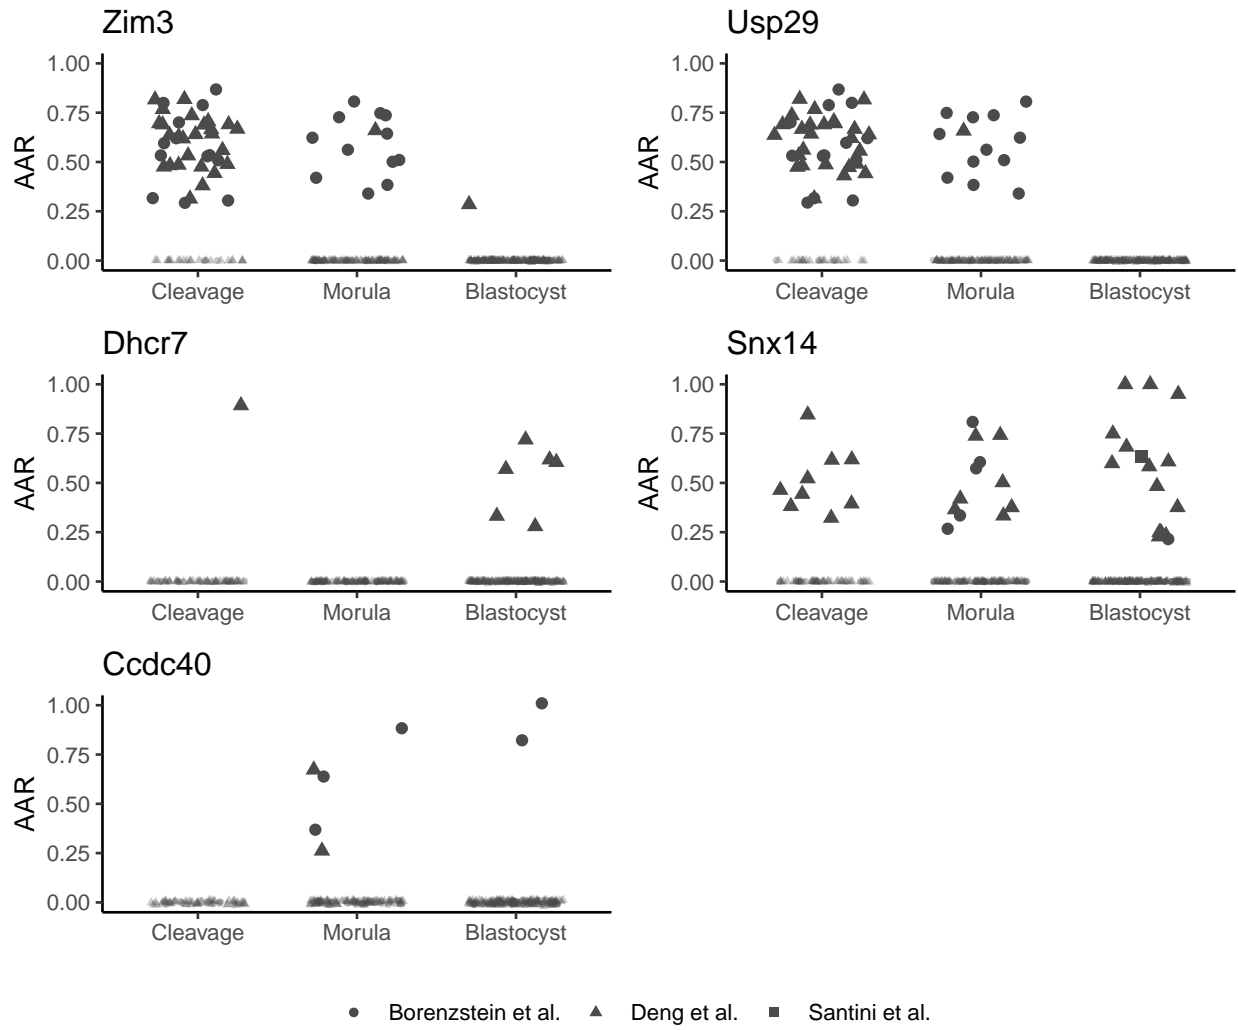

**Supplementary Figure 8.** Genes with frequent LOI in mouse embryo development obtained by studying three dataset (Borenzstein et al., Santini et al., and Deng et al.). On the y axis, the Average Allelic Ratios (AAR) of single samples (single cells or bulk for Santini et al dataset). Developmental stages has been collapsed into broader categories (Cleavage, Morula and Blastocyst).

| Description                                  | Datasets                       | Shown                                   | Species | Type      | Samples (n) | Average Depth                           | Run time Standard mode | Run time Complete mode |
|----------------------------------------------|--------------------------------|-----------------------------------------|---------|-----------|-------------|-----------------------------------------|------------------------|------------------------|
| Parameter settings - BJ Fibroblasts          | GSE110377; GSE126397; GSE63577 | Figure 1b, Supplementary Figure 2       | Human   | Bulk      | 6           | 37 M                                    | 2.5h                   | 3.5h                   |
| Reprogramming of BJ fibroblasts              | GSE110377; GSE126397; GSE63577 | Figure 1c,d, Supplementary Figure 4     | Human   | Bulk      | 10          | 28 M                                    | 3h                     | 4.5h                   |
| Reprogramming of HFF Fibroblasts             | GSE93226; GSE110377            | Supplementary Figure 5                  | Human   | Bulk      | 3           | 21 M                                    | 1h                     | 1.5h                   |
| mESCS - 2i/L and S/L conditions              | GSE84164                       | Figure 1f                               | Mouse   | Bulk      | 8           | 22M                                     | 2h                     | 3h                     |
| mESCs - bulk and single-cell RNaseq          | E-MTAB-2600                    | Figure 1g, Figure2a                     | Mouse   | SC / Bulk | 672/3       | 7 M [70M - 0.004M] / 52M                | 16h                    | -                      |
| Early mouse development                      | GSE45719                       | Figure 2b,c, Supplementary Figure 6-7-8 | Mouse   | SC        | 296         | 22M [139M - 1.3M]                       | 7h                     | -                      |
| Blastocyst-stage embryos                     | GSE152106                      | Figure 2c, Supplementary Figure 8       | Mouse   | Bulk      | 8           | 35M [43.9M - 25.3M]                     |                        | 1h                     |
| Early mouse development                      | GSE80810                       | Figure 2c, Supplementary Figure 8       | Mouse   | SC        | 113         | 18M [85M - 6M]                          |                        | 5h                     |
| Human fibroblasts and lymphoblastoid cells   | GSE123028                      | Figure 2d,e                             | Human   | SC        | 820         | 18 M [37M - 0.0004M]                    | 20h                    | -                      |
| Breast cancer- bulk and single-cell RNAseq   | GSE75688                       | Figure 2g                               | Human   | SC / Bulk | 515/12      | 5.8M [11.1M - 3.1M] / 10M [7.8M - 4.6M] | 5h (SC only)           | 2.5h (bulk only)       |
| Fetal neocortex and human cerebral organoids | GSE75140                       | Figure 3, Supplementary Figure 9        | Human   | SC        | 734         | 1.95M [4.02M - 0.01M]                   | 11h                    | -                      |
| ESC-derived MiniBrains                       | GSE124174                      | Figure 3, Supplementary Figure 9        | Human   | SC        | 3           | 20.3M; 22.2M; 18.9M                     | -                      | 1h                     |
| iPSC-derived MiniBrains                      | GSE86153                       | Figure 3, Supplementary Figure 9        | Human   | SC        | 2           | 301M; 250M                              | -                      | 3h                     |
| ESC and iPSC derived cortical organoids      | E-MTAB-8337                    | Figure 3, Supplementary Figure 9        | Human   | SC        | 2           | 66.9M; 50.6M                            | -                      | 2h                     |
| iPSC derived cortical organoids              | GSE112137                      | Figure 3, Supplementary Figure 9        | Human   | Bulk      | 4           | 23.5M; 10.1M; 9.5M; 26.0M               | -                      | 3.5h                   |
| ESC and iPSC derived cortical organoids      | E-MTAB-8325                    | Figure 3, Supplementary Figure 9        | Human   | Bulk      | 4           | 25.9M; 17.7M; 35.0M; 29.0M              | -                      | 2h                     |

Supplementary Table 1

**Supplementary Table 1.** List of datasets used for the case studies. Details on number of samples, organism, figure panels where the dataset results are shown, samples' types (bulks or single-cell RNAseq), average sequencing depth per samples, BrewerIX pipeline used and run times on a Linux Gnome Desktop (12 CPU, 32 Gb Ram PC) are reported.

| Validation of SNVs by PCR followed by Sanger sequencing |     |           |     |     |                |                           |                                            | HPD01 Naive iPSCs -<br>GSM2988898 |     | HPD03 Naive iPSCs -<br>GSM2988903 |     | HPD04 Naive iPSCs -<br>GSM2988904 |     |
|---------------------------------------------------------|-----|-----------|-----|-----|----------------|---------------------------|--------------------------------------------|-----------------------------------|-----|-----------------------------------|-----|-----------------------------------|-----|
| SNV                                                     | Chr | position  | ref | alt | Gene<br>symbol | Sanger<br>sequenc-<br>ing | Expression<br>in naive<br>iPSCs<br>(HPD03) | Ref                               | Alt | Ref                               | Alt | Ref                               | Alt |
| rs2228613                                               | 19  | 10154917  | G   | T   | DNMT1          | confirmed                 | bi-allelic                                 | 23                                | 7   | 14                                | 33  | 17                                | 10  |
| rs61750052                                              | 19  | 10154368  | G   | A   | DNMT1          | confirmed                 | bi-allelic                                 | 22                                | 7   | 26                                | 19  | 16                                | 13  |
| rs2839703                                               | 11  | 1995432   | T   | C   | H19            | confirmed                 | bi-allelic                                 | 101                               | 91  | 92                                | 19  | 136                               | 57  |
| rs2839704                                               | 11  | 1995429   | T   | C   | H19            | confirmed                 | bi-allelic                                 | 102                               | 91  | 92                                | 20  | 132                               | 56  |
| rs3741219                                               | 11  | 1995389   | A   | G   | H19            | confirmed                 | bi-allelic                                 | 51                                | 47  | 51                                | 51  | 79                                | 52  |
| rs2400941                                               | 14  | 100834230 | C   | G   | MEG3           | confirmed                 | bi-allelic                                 | 142                               | 115 | 457                               | 460 | 150                               | 166 |
| rs8013873                                               | 14  | 100835753 | C   | T   | MEG3           | confirmed                 | bi-allelic                                 | 382                               | 267 | 1128                              | 886 | 335                               | 271 |
| rs2289998                                               | 11  | 3088178   | C   | T   | OSBPL5         | confirmed                 | bi-allelic                                 | -                                 | -   | 3                                 | 2   | -                                 | -   |
| rs2289999                                               | 11  | 3088173   | A   | G   | OSBPL5         | confirmed                 | bi-allelic                                 | -                                 | -   | 3                                 | 2   | -                                 | -   |
| rs935431                                                | 11  | 3088067   | G   | A   | OSBPL5         | confirmed                 | bi-allelic                                 | -                                 | -   | 4                                 | 1   | -                                 | -   |
| rs11555134                                              | 7   | 50591496  | C   | T   | GRB10          | confirmed                 | bi-allelic                                 | 2                                 | 5   | -                                 | -   | 3                                 | 2   |
| rs2192206                                               | 15  | 23686360  | G   | A   | NDN            | confirmed                 | bi-allelic                                 | 18                                | 9   | 18                                | 13  | 27                                | 15  |

**Supplementary Table 2**

11

**Supplementary Table 2.** List of SNVs validated by PCR followed by Sanger sequencing. Chromosome position, gene symbol, reference and alternative alleles along with their read counts for each sample are reported.

| Primer Name       | Sequence (5' -> 3')       |
|-------------------|---------------------------|
| DNMT1_rs61750052f | CGGCCTCATCGAGAAGAATA      |
| DNMT1_rs61750052r | GTGATCCTCTGGCCTCAGAC      |
| DNMT1_rs2228613f  | TCAGCAAGATTGTGGTGGAG      |
| DNMT1_rs2228613r  | CCAAACTGGCCTAAATCCAA      |
| GRB10_f           | TGGCCATTTCCCTACCTTTG      |
| GRB10_r           | GGGTTGACTGAGGAGCAGAG      |
| H19_f             | TTCAAAGCCTCCACGACTCT      |
| H19_r             | GTCGGAGCTTCCAGACTAGG      |
| MEG3_rs2400941f   | CGGGTGTAGACCTCTGAAGC      |
| MEG3_rs2400941r   | TTTGGGGCCTGTATGTGAAT      |
| MEG3_rs8013873f   | GCCCTCCTGTGGTCTGAGTA      |
| MEG3_rs8013873r   | ACGATCACGAGGGGTCTCT       |
| NDN_f             | CCCGAATACGAGTTCTTTTGG     |
| NDN_r             | TGAATACTGCACTGTAAATCCTGAA |
| OSBPL5_f          | ACCACATCCTCAAATAGGAG      |
| OSBPL5_r          | CCTGCAGAGAGGCCAGTG        |
| NAP1L4_rs7105693f | GGGAAAAGTGTTTTAGGCTTCCA   |
| NAP1L4_rs7105693r | ACAACATATAGTTTCGGGAGGCA   |
| DLK1_rs1802710f   | CTGCAGGTCTTGTCGATGAA      |
| DLK1_rs1802710r   | TGGCTTCTCAGGCAATTTCT      |
| UBE3A_rs8179187f  | TTTTGCTGCCTACGTGTTTG      |
| UBE3A_rs8179187r  | GTACCCCAAGATTGCTTCCA      |
| PEG3_rs34051133f  | GGGAGTGCTCAGGCTACATC      |
| PEG3_rs34051133r  | CCTCAGCCAGTGTGGGTATT      |

**Supplementary Table 3**

**Supplementary Table 3.** Primers used for PCR and Sanger sequencing
